# Supplementary material for: Alkyl-substituted poly(arylene piperidinium) membranes enhancing the performance of high-temperature polymer electrolyte membrane fuel cells
Source: Royal Society of Chemistry journal article supplement (doi:10.1039/d3ta02158k), 2023-01-01
Supplement: d3ta02158k1.pdf [file d3ta02158k1.pdf]

## Supporting Information

### **Alkyl-substituted poly(arylene piperidinium) membranes enhancing the performance of high-temperature polymer electrolyte membrane fuel cells**

*Jinyuan Li,<sup>abc</sup> Congrong Yang,<sup>ab</sup> Xiaoming Zhang,<sup>ab</sup> Zhangxun Xia,<sup>ab</sup> Suli Wang,<sup>\*ab</sup> Shansheng Yu,<sup>d</sup> and Gongquan Sun<sup>\*ab</sup>*

*<sup>a</sup> Division of Fuel Cells and Battery, Dalian National Laboratory for Clean Energy, Dalian Institute of Chemical Physics, Chinese Academy of Sciences, Dalian 116023, China.*

*<sup>b</sup> Key Laboratory of Fuel Cells & Hybrid Power Sources, Chinese Academy of Sciences, Dalian 116023, China.*

*<sup>c</sup> University of Chinese Academy of Sciences, Beijing 100039, China.*

*<sup>d</sup> Key Laboratory of Automobile Materials of MOE and Department of Materials Science, Jilin University, Changchun 130012, P. R. China*

E-mail: suliwang@dicp.ac.cn; gqsun@dicp.ac.cn

## Supporting Figures

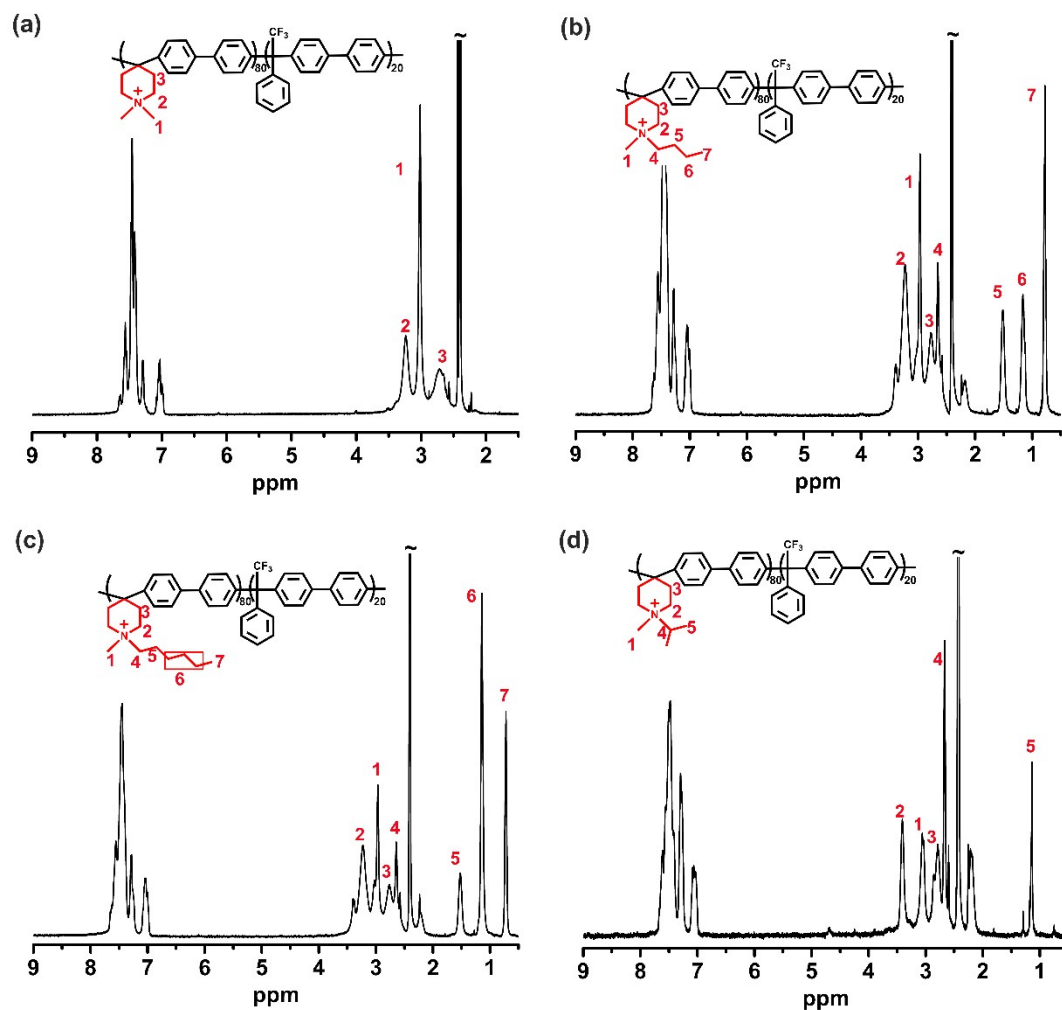

**Fig. S1**  $^1\text{H}$  NMR spectra of (a) PAP-BP-80-Me, (b) PAP-BP-80-Bu, (c) PAP-BP-80-He, and (d) PAP-BP-80-iPr. The spectra were recorded with  $\text{DMSO-d}_6$  solution containing 10 vol% of Trifluoroacetic acid (TFA). The anion is omitted for clarity.

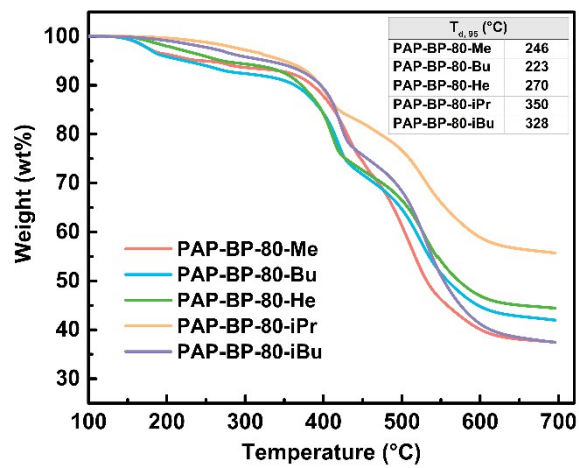

**Fig. S2** TGA traces of PAP-BP-80-R membranes measured at 10 °C min<sup>-1</sup> under Argon atmosphere.

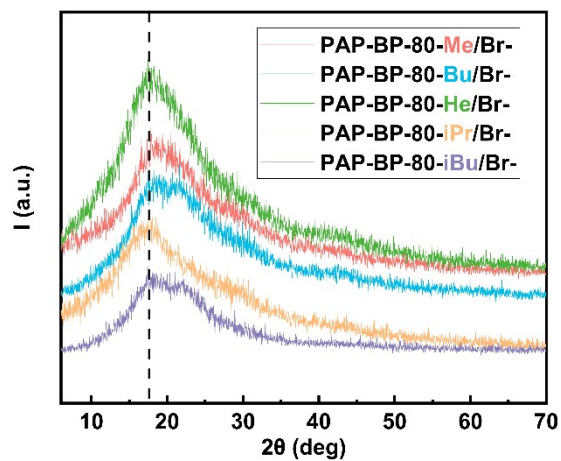

**Fig. S3** X-Ray diffraction spectra of PAP-BP-80-R. The dashed line denotes the peak for PAP-BP-80-He, -iPr, and -iBu, which corresponds to lower  $2\theta$  values and higher d-spacing.

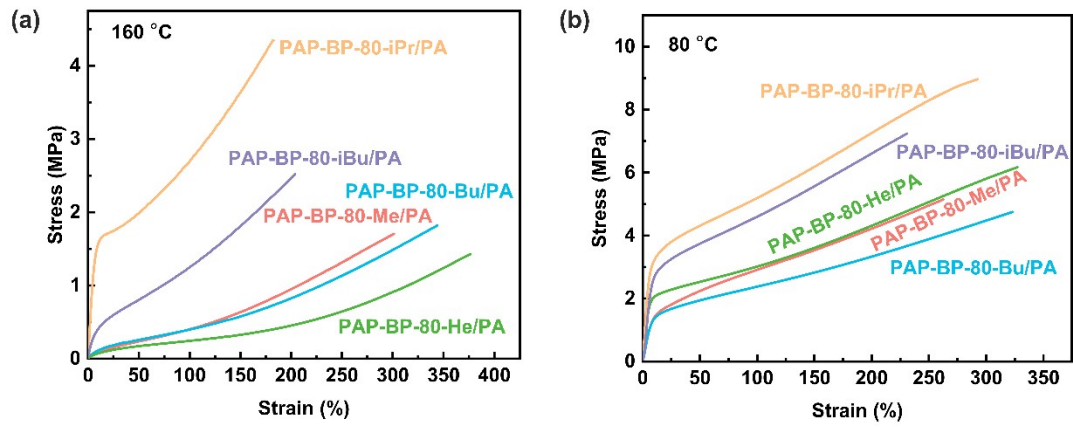

**Fig. S4** Stress-strain curves of PA-doped PAP membranes at 160 °C (a) and 80 °C (b).

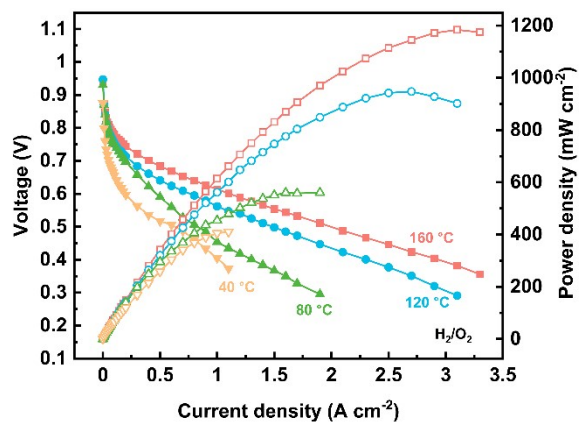

**Fig. S5** H<sub>2</sub>/O<sub>2</sub> Fuel cell performance of PAP-BP-80-iBu/PA. Testing conditions: cathode: PtCo/C (1.5 mg<sub>Pt</sub> cm<sup>-2</sup>), anode: Pt/C (0.5 mg<sub>Pt</sub> cm<sup>-2</sup>), PTFE binder. The thickness of the PA-doped PEMs was approximately 60 μm.

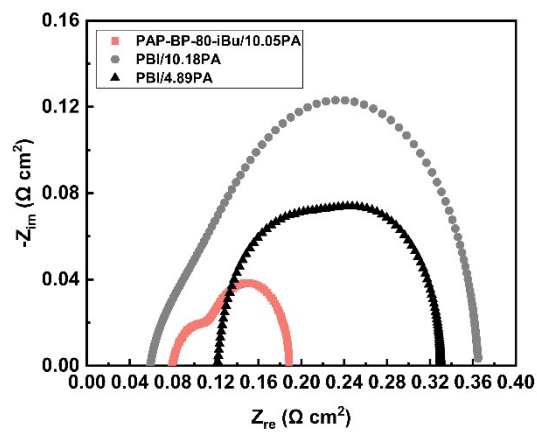

**Fig. S6** EIS analysis of PAP-BP-80-iBu/10.05PA, PBI/10.18PA and PBI/4.89PA MEA at 120 °C, H<sub>2</sub>/O<sub>2</sub> (0.1/0.2 slpm) and at 0.8 A cm<sup>-2</sup>.

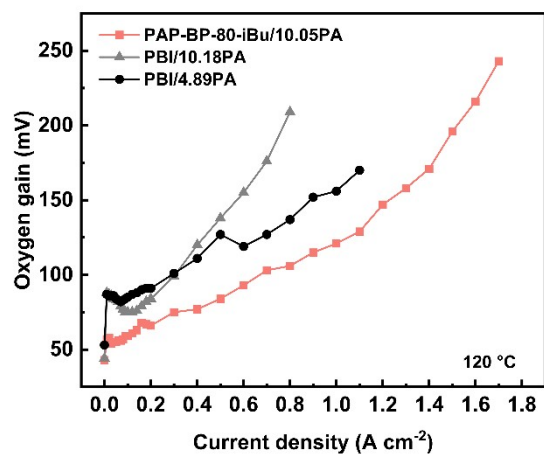

**Fig. S7** Oxygen gain of fuel cells based on PA-doped PAP-BP-80-iBu and PBI membranes.



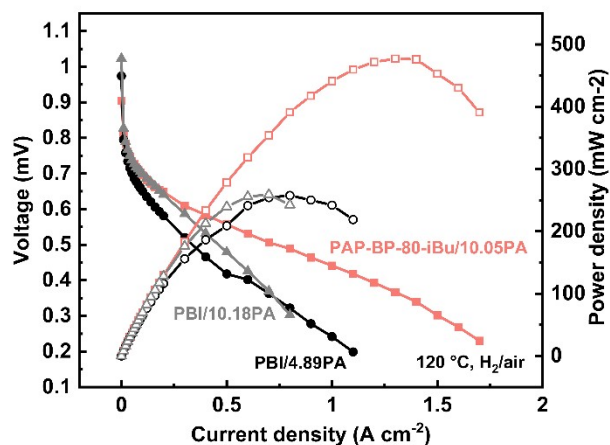

**Fig. S8** i-V curve and power density of HT-PEMFCs using PA-doped PAP-BP-80-iBu and *m*-PBI membranes at 120 °C and  $\text{H}_2/\text{air}$  condition without external humidification or backpressure. Testing conditions: anode: Pt/C ( $0.5 \text{ mg}_{\text{Pt}} \text{ cm}^{-2}$ ), cathode: PtCo/C ( $1.5 \text{ mg}_{\text{Pt}} \text{ cm}^{-2}$ ), PTFE binder. The thickness of the PA-doped PEMs was approximately 60  $\mu\text{m}$ .

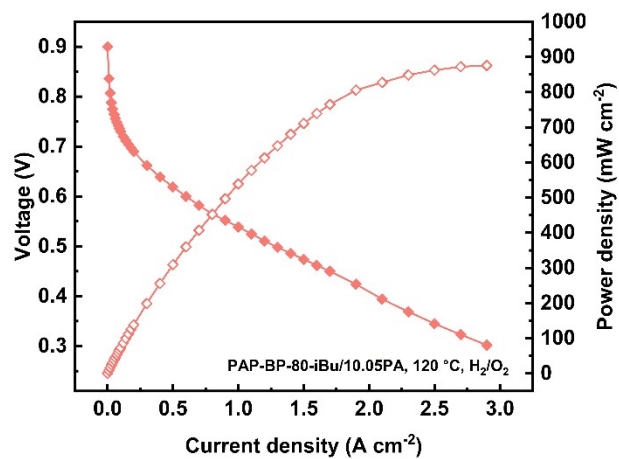

**Fig. S9** i-V curve and power density of HT-PEMFCs using PA-doped PAP-BP-80-iBu at 120 °C without external humidification or backpressure. Testing conditions: anode: Pt/C (0.5 mg<sub>Pt</sub> cm<sup>-2</sup>), cathode: PtCo/C (0.5 mg<sub>Pt</sub> cm<sup>-2</sup>), PTFE binder. The thickness of the PA-doped membrane was 36 μm.

## Supporting Tables

**Table S1** PA uptake and ADL of PA-doped membranes.

| PA-doped membrane | 72% PA      |               |       | 85% PA    |               |       |
|-------------------|-------------|---------------|-------|-----------|---------------|-------|
|                   | PA uptake/% | $\omega$ (PA) | ADL   | PA uptake | $\omega$ (PA) | ADL   |
| PAP-BP-80-Me      | 302.8       | 66.3          | 10.96 | 421.4     | 77.8          | 16.61 |
| PAP-BP-80-Bu      | 270.3       | 59.1          | 9.35  | 385.2     | 77.8          | 16.14 |
| PAP-BP-80-He      | 207.8       | 57.3          | 7.72  | 345.9     | 65.0          | 12.71 |
| PAP-BP-80-iPr     | 246         | 55.4          | 7.02  | 323       | 69.1          | 10.72 |
| PAP-BP-80-iBu     | 300.9       | 65.5          | 10.05 | 405.8     | 63.6          | 12.28 |
| PBI               | 205         | 51            | 4.89  | 427.5     | 61.5          | 10.18 |

**Table S2** Comparison of proton conductivity and mechanical strength of ion-pair membranes.

| PEM (PA-doped) | $\sigma^b$<br>(mS cm <sup>-1</sup> ) | TS <sup>d</sup><br>(MPa)      | Reference |
|----------------|--------------------------------------|-------------------------------|-----------|
|                |                                      | 2.53 (160 °C)                 |           |
| PAP-BP-80-iBu  | 107.7 (160 °C)                       | 5.15 (120 °C)<br>7.13 (80 °C) | This work |
| QAPOH          | 131 (160 °C)                         | 1.6-3 (80 °C)                 | 1,2       |
| PPO-BIm-65-15  | 54 (140 °C)                          | 2.8 (80 °C)                   | 3         |
| Methyl-QPEEK   | 50 (200 °C)                          | 6 (130 °C)                    | 4         |
| PVC-42%7#      | 48 (160 °C)                          | 14.2 (rt)                     | 5         |
| PVC-19%APIIm   | 257 (180 °C)                         | 2.2 (120 °C)                  | 6         |
| PTP-BeIm       | 88 (180 °C)                          | 3.3 (rt)                      | 7         |

**Table S3** Membranes used for fuel cell performance evaluation.

| Membrane (PA-doped) | Thickness ( $\mu\text{m}$ ) | Acid uptake (%) | ADL   | $\sigma$ ( $\text{mS cm}^{-1}$ ) |      |
|---------------------|-----------------------------|-----------------|-------|----------------------------------|------|
|                     |                             |                 |       | 160 °C                           | rt   |
| PAP-BP-80-iBu       | 58                          | 300.9           | 10.05 | 109                              | 23.2 |
| PBI                 | 57                          | 427.5           | 10.18 | 98.3                             | 6.2  |
| PBI                 | 60                          | 204.8           | 4.89  | 50.6                             | 46.1 |

**Table S4** Summary and Comparison of the representative PEMFCs performances under H<sub>2</sub>/O<sub>2</sub> condition in current research.

| PEM (PA-doped)                                                  | Pt (mg cm <sup>-2</sup> ) cathode<br>(-, anode (+)) | Temp<br>(°C) | Power density<br>(mW cm <sup>-2</sup> ) | Ref.         |
|-----------------------------------------------------------------|-----------------------------------------------------|--------------|-----------------------------------------|--------------|
|                                                                 |                                                     | 160          | 1228                                    |              |
| PAP-BP-80-iBu                                                   | 1.5 (-), 0.5 (+)                                    | 120          | 947                                     | This<br>work |
|                                                                 |                                                     | 80           | 560                                     |              |
|                                                                 |                                                     | 40           | 410                                     |              |
|                                                                 |                                                     | 160          | 1651                                    |              |
| PAP-BP-80-iBu                                                   | 1.5 (-), 0.5 (+)                                    | 120          | 1539                                    | This<br>work |
|                                                                 |                                                     | 80           | 875                                     |              |
|                                                                 |                                                     | 160          | 1673                                    |              |
| QAPOH (QASOH binder)                                            | 0.75 (-), 1.0 (+)                                   | 180          | 800                                     | 1            |
| QAPOH (PWN70 binder)                                            | 0.6 (-), 0.5 (+)                                    | 160          | 1130                                    | 2            |
|                                                                 |                                                     | 120          | 680                                     |              |
| QAPOH (Nafion-PWN70 binder)                                     | 0.7 (-), 0.5 (+)                                    | 160          | 1673                                    | 8            |
|                                                                 |                                                     | 120          | 960                                     |              |
|                                                                 |                                                     | 80           | 525                                     |              |
|                                                                 |                                                     | 160          | 815                                     |              |
| DMBP-TB                                                         | 0.5                                                 | 80           | 354                                     | 9            |
|                                                                 |                                                     | 40           | 216                                     |              |
|                                                                 |                                                     | 150          | 453                                     |              |
| TDAP-PSU-88                                                     | 0.5                                                 | 150          | 453                                     | 10           |
| P/CN-0.5 (CN-doped PES/PVP)                                     | 0.4                                                 | 160          | 512                                     | 11           |
| PPW-5 (PWA-doped PES/PVP)                                       | 0.35                                                | 160          | 416                                     | 12           |
| PES/PVP                                                         | 0.35                                                | 160          | 637                                     | 13           |
| Asymmetrical porous PBI                                         | 1.0                                                 | 160          | 835                                     | 14           |
| p-OPBI-ATMP                                                     | 1.2 (total)                                         | 160          | 980                                     | 15           |
|                                                                 |                                                     | 80           | 268.1                                   |              |
| ABPBI/5IL@SNR (ABPBI with<br>silicon nanorods and ionic liquid) | 0.4                                                 | 180          | 280                                     | 16           |
|                                                                 |                                                     | 120          | 210                                     |              |
|                                                                 |                                                     | 80           | 150                                     |              |
| PTP-41%BeIm                                                     | 1.13                                                | 180          | 995                                     | 7            |
|                                                                 |                                                     | 120          | 593                                     |              |
| P-BPSH60                                                        | 0.5                                                 | 100          | 1121                                    | 17           |
| M-BT                                                            | 0.5 (-, Pt/C), 0.5 (+,<br>Pt/C)                     | 80           | 696                                     | 18           |
| Nafion HP                                                       | 0.1 (-, Pt/C), 0.1 (+,<br>Pt/C)                     | 80           | 1370                                    | 19           |

|                         |                                                   |     |      |    |
|-------------------------|---------------------------------------------------|-----|------|----|
| NRE 211                 | 0.2 (-, sub-Pt <sub>3</sub> Co-MC), 0.2 (+, Pt/C) | 80  | 1770 | 20 |
|                         | 0.5                                               | 120 | 350  | 21 |
| Pt-SiO <sub>2</sub> /NP | 0.5 (-), 0.3 (+)                                  | 60  | 1400 | 22 |
| SPP-QP-f                | 0.5                                               | 120 | 390  | 21 |

## Reference

1. K.-S. Lee, J. S. Spendelow, Y.-K. Choe, C. Fujimoto and Y. S. Kim, *Nat Energy*, 2016, **1**, 16120.
2. V. Atanasov, A. S. Lee, E. J. Park, S. Maurya, E. D. Baca, C. Fujimoto, M. Hibbs, I. Matanovic, J. Kerres and Y. S. Kim, *Nature Materials*, 2021, **20**, 370-377.
3. Q. Li, L. Liu, S. Liang, Q. Li, B. Jin and R. Bai, *Polym. Chem.*, 2014, **5**, 2425.
4. N. Zhang, B. Wang, C. Zhao, S. Wang, Y. Zhang, F. Bu, Y. Cui, X. Li and H. Na, *J. Mater. Chem. A*, 2014, **2**, 13996-14003.
5. R. Liu, M. Liu, S. Wu, X. Che, J. Dong and J. Yang, *European Polymer Journal*, 2020, **137**, 109948.
6. R. Liu, Y. Dai, J. Li, X. Chen, C. Pan, J. Yang and Q. Li, *Journal of Membrane Science*, 2021, **620**, 118873.
7. Y. Jin, T. Wang, X. Che, J. Dong, R. Liu and J. Yang, *Journal of Membrane Science*, 2022, **641**, 119884.
8. K. H. Lim, A. S. Lee, V. Atanasov, J. Kerres, E. J. Park, S. Adhikari, S. Maurya, L. D. Manriquez, J. Jung, C. Fujimoto, I. Matanovic, J. Jankovic, Z. Hu, H. Jia and Y. S. Kim, *Nat Energy*, 2022, **7**, 248-259.
9. H. Tang, K. Geng, L. Wu, J. Liu, Z. Chen, W. You, F. Yan, M. D. Guiver and N. Li, *Nat Energy*, 2022, **7**, 153-162.
10. J. Zhang, J. Zhang, H. Bai, Q. Tan, H. Wang, B. He, Y. Xiang and S. Lu, *Journal of Membrane Science*, 2019, **572**, 496-503.
11. H. Bai, H. Wang, J. Zhang, C. Wu, J. Zhang, Y. Xiang and S. Lu, *Journal of Membrane Science*, 2018, **558**, 26-33.
12. J. Zhang, S. Chen, H. Bai, S. Lu, Y. Xiang and S. P. Jiang, *International Journal of Hydrogen Energy*, 2021, **46**, 11104-11114.
13. J. Zhang, H. Bai, W. Yan, J. Zhang, H. Wang, Y. Xiang and S. Lu, *Journal of The Electrochemical Society*, 2020, **167**, 114501.
14. L.-C. Jheng, W. J.-Y. Chang, S. L.-C. Hsu and P.-Y. Cheng, *Journal of Power Sources*, 2016, **323**, 57-66.
15. W. Li, W. Liu, J. Zhang, H. Wang, S. Lu and Y. Xiang, *Advanced Functional Materials*, 2022, **33**, 2210036.
16. X. Zhang, X. Fu, S. Yang, Y. Zhang, R. Zhang, S. Hu, X. Bao, F. Zhao, X. Li and Q. Liu, *Journal of Materials Chemistry A*, 2019, **7**, 15288-15301.
17. C. H. Park, S. Y. Lee, D. S. Hwang, D. W. Shin, D. H. Cho, K. H. Lee, T. W. Kim, T. W. Kim, M. Lee, D. S. Kim, C. M. Doherty, A. W. Thornton, A. J.

- Hill, M. D. Guiver and Y. M. Lee, *Nature*, 2016, **532**, 480-483.
18. Y. Sui, Y. Du, H. Hu, J. Qian and X. Zhang, *Journal of Materials Chemistry A*, 2019, **7**, 19820-19830.
  19. F. Xiao, Q. Wang, G.-L. Xu, X. Qin, I. Hwang, C.-J. Sun, M. Liu, W. Hua, H.-w. Wu, S. Zhu, J.-C. Li, J.-G. Wang, Y. Zhu, D. Wu, Z. Wei, M. Gu, K. Amine and M. Shao, *Nature Catalysis*, 2022, **5**, 503-512.
  20. H. Cheng, R. Gui, H. Yu, C. Wang, S. Liu, H. Liu, T. Zhou, N. Zhang, X. Zheng, W. Chu, Y. Lin, H. Wu, C. Wu and Y. Xie, *Proc Natl Acad Sci U S A*, 2021, **118**, e2104026118.
  21. Z. Long and K. Miyatake, *ACS Appl Mater Interfaces*, 2021, **13**, 15366-15372.
  22. X. Zhu, H. Zhang, Y. Zhang, Y. Liang, X. Wang and B. Yi, *The Journal of Physical Chemistry B*, 2006, **110**, 14240-14248.
